# Supplementary material for: A novel microfluidic paper-based analytical device based on chemiluminescence for the determination of β-agonists in swine hair
Source: Royal Society of Chemistry journal article supplement (doi:10.1039/c9ay02754h), 2020-01-01
Supplement: c9ay02754h1.pdf [file c9ay02754h1.pdf]

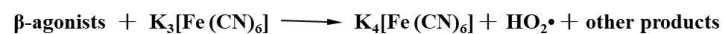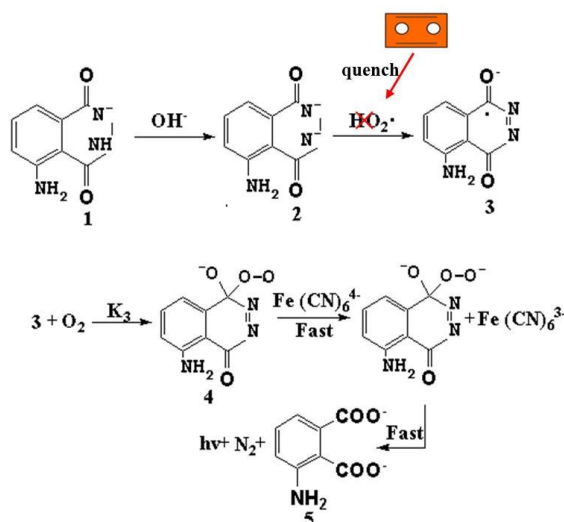

Figure S1 Schematic reaction of the CL diminishment mechanism on the μPAD.

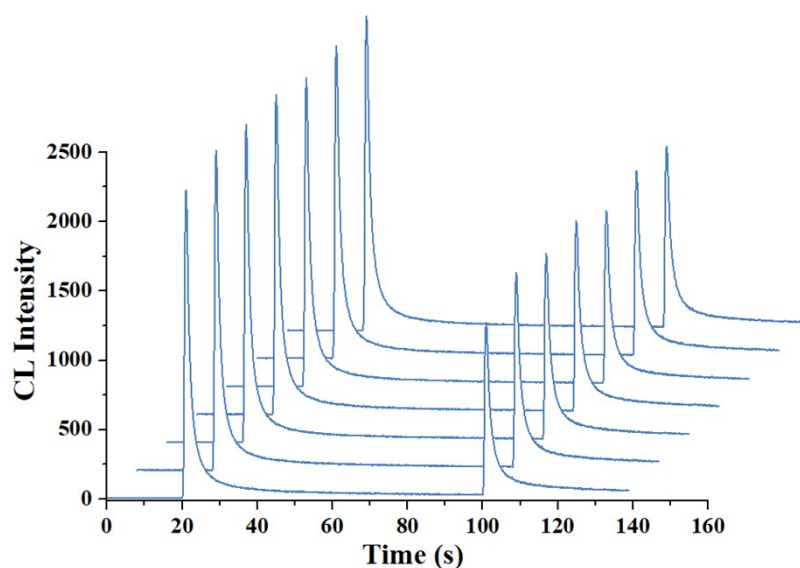

Figure S2 Repeatability analysis for the detection of β-agonists (1.0×10<sup>-6</sup>mol/L) on the μPAD CL sensor.
